# Supplementary material for: Disruption of selenium transport and function is a major contributor to mercury toxicity in zebrafish larvae
Source: Royal Society of Chemistry journal article supplement (doi:10.1039/c8mt00315g), 2019-01-14
Supplement: c8mt00315g1.pdf [file c8mt00315g1.pdf]

## Disruption of selenium transport and function is a major contributor to mercury toxicity in zebrafish larvae

Natalia V. Dolgova,<sup>a</sup> Susan Nehzati,<sup>a</sup> Tracy C. MacDonald,<sup>a†</sup> Kelly L. Summers,<sup>b</sup> Andrew M. Crawford,<sup>a</sup> Patrick H. Krone,<sup>c</sup> Graham N. George<sup>ab\*</sup> and Ingrid J. Pickering<sup>ab\*</sup>

<sup>a</sup> Molecular and Environment Sciences Group, Department of Geological Sciences, University of Saskatchewan, 114 Science Place, Saskatoon, Saskatchewan S7N 5E2, Canada.

<sup>b</sup> Department of Chemistry, University of Saskatchewan, 110 Science Place, Saskatoon, Saskatchewan S7N 5C9, Canada.

<sup>c</sup> Department of Anatomy and Cell Biology, University of Saskatchewan, Saskatoon, Saskatchewan S7N 5E5, Canada.

† Present address: Associated Environmental Consultants Inc., 500, 9888 Jasper Avenue, Edmonton, Alberta T5J 5C6, Canada.

\* Corresponding authors. E-mail: ingrid.pickering@usask.ca, g.george@usask.ca

a

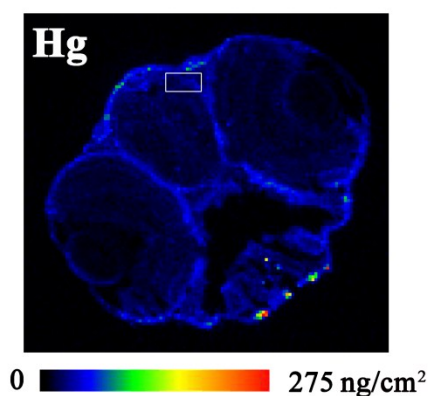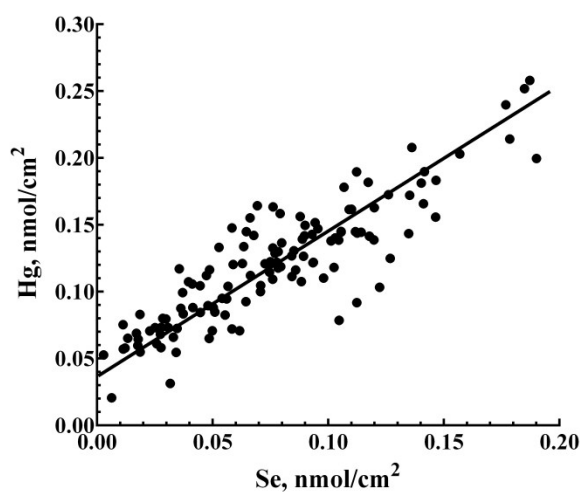

b

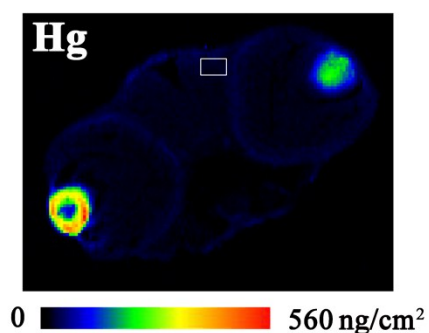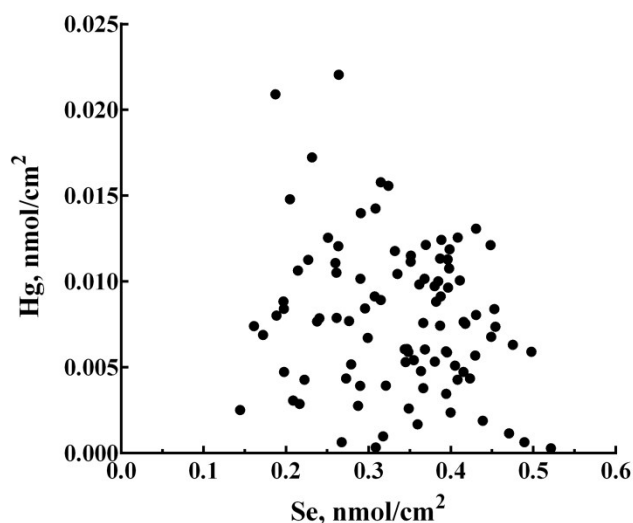

**Figure 1S.** Hg vs. Se correlation plots for pixels from the region of brain including brain-blood barrier. XFI (insets) of zebrafish larvae treated with (a) L-selenomethionine at 3 dpf followed by mercuric chloride at 4 dpf (treatment pictured on Fig. 2E) and (b) L-selenomethionine at 3 dpf followed by methylmercury at 4 dpf (treatment pictured on Fig. 2F) together with corresponding XFI used for plotting. Plot a shows significant correlation with  $R^2$  0.77 for the sample treated with selenomethionine and inorganic mercury (a), and an absence of correlation ( $R^2$  0.12) in the sample treated with selenomethionine and organic mercury (b).

**Table S1.** Significant differences between Se treatments.

| Quantity    | Comparison of Se treatments | No Hg | HgCl <sub>2</sub> | MeHgCl |
|-------------|-----------------------------|-------|-------------------|--------|
| Hg in brain | 3 dpf Se vs no Se           | ns    | ns                | ns     |
| Hg in brain | 5 dpf Se vs no Se           | ↓**   | ns                | ns     |
| Se in brain | 3 dpf Se vs no Se           | ns    | ↑*                | ↑**    |
| Se in brain | 5 dpf Se vs no Se           | ↑**   | ns                | ns     |
| Hg in RPE   | 3 dpf Se vs no Se           | ns    | ns                | ns     |
| Hg in RPE   | 5 dpf Se vs no Se           | ns    | ns                | ↑*     |
| Se in RPE   | 3 dpf Se vs no Se           | ↑*    | ↑****             | ↑****  |
| Se in RPE   | 5 dpf Se vs no Se           | ↑**** | ns                | ns     |
| T4          | 3 dpf Se vs no Se           | ↓**   | ↓**               | ns     |
| T4          | 5 dpf Se vs no Se           | ns    | ns                | ↓**    |
| T3          | 3 dpf Se vs no Se           | ↓**** | ↓*                | ↓****  |
| T3          | 5 dpf Se vs no Se           | ↓**** | ns                | ↓****  |

**Table S2.** Significant differences between Hg treatments.

| Quantity    | Comparison of Hg treatments | No Se | +3 dpf Se | +5 dpf Se |
|-------------|-----------------------------|-------|-----------|-----------|
| Hg in brain | HgCl <sub>2</sub> vs no Hg  | ns    | ↑**       | ns        |
| Hg in brain | MeHgCl vs no Hg             | ↑***  | ↑**       | ↑***      |
| Se in brain | HgCl <sub>2</sub> vs no Hg  | ↓*    | ns        | ↓***      |
| Se in brain | MeHgCl vs no Hg             | ↓*    | ns        | ↓**       |
| Hg in RPE   | HgCl <sub>2</sub> vs no Hg  | ns    | ↑**       | ns        |
| Hg in RPE   | MeHgCl vs no Hg             | ↑**** | ↑****     | ↑****     |
| Se in RPE   | HgCl <sub>2</sub> vs no Hg  | ns    | ↑****     | ↓****     |
| Se in RPE   | MeHgCl vs no Hg             | ns    | ↑****     | ↓****     |
| T4          | HgCl <sub>2</sub> vs no Hg  | ns    | ns        | ns        |
| T4          | MeHgCl vs no Hg             | ↑*    | ↑****     | ns        |
| T3          | HgCl <sub>2</sub> vs no Hg  | ↓**** | ns        | ↓**       |
| T3          | MeHgCl vs no Hg             | ↑**** | ↑**       | ↓*        |

Statistically significant differences between stated treatments are labelled with asterisks: one asterisk means  $P \leq 0.05$ , two –  $P \leq 0.01$ , three –  $P \leq 0.001$ , four –  $P \leq 0.0001$ . ns, not significant. Arrows indicate ↑ increase or ↓ decrease relative to no treatment.
